# Supplementary material for: Ruthenium nitrosyl complexes with NO release capability: the use of fluorene as an antenna
Source: Royal Society of Chemistry journal article supplement (doi:10.1039/d4dt01154f), 2024-01-01

*Supplementary Information*

*for*

Ruthenium nitrosyl complexes with NO release capability: the use of fluorene as an antenna

**Vladyslav Mudrak, Pascal G. Lacroix, Marine Tassé, Sonia Mallet-Ladeira, Alexander Roshal, Isabelle Malfant**

**Summary**

|                                                         |       |
|---------------------------------------------------------|-------|
| 1. NMR spectra .....                                    | P. 2  |
| 2. X-ray data .....                                     | P. 10 |
| 3. Atomic coordinates .....                             | P. 24 |
| 4. Photorelease experiments at $\lambda = 300$ nm ..... | P. 29 |
| 5. Rotation barrier fluorene vs terpyridine .....       | P. 30 |

# 1. NMR Spectra

## (9,9-dihexyl-9H-fluoren-2-yl)methanol

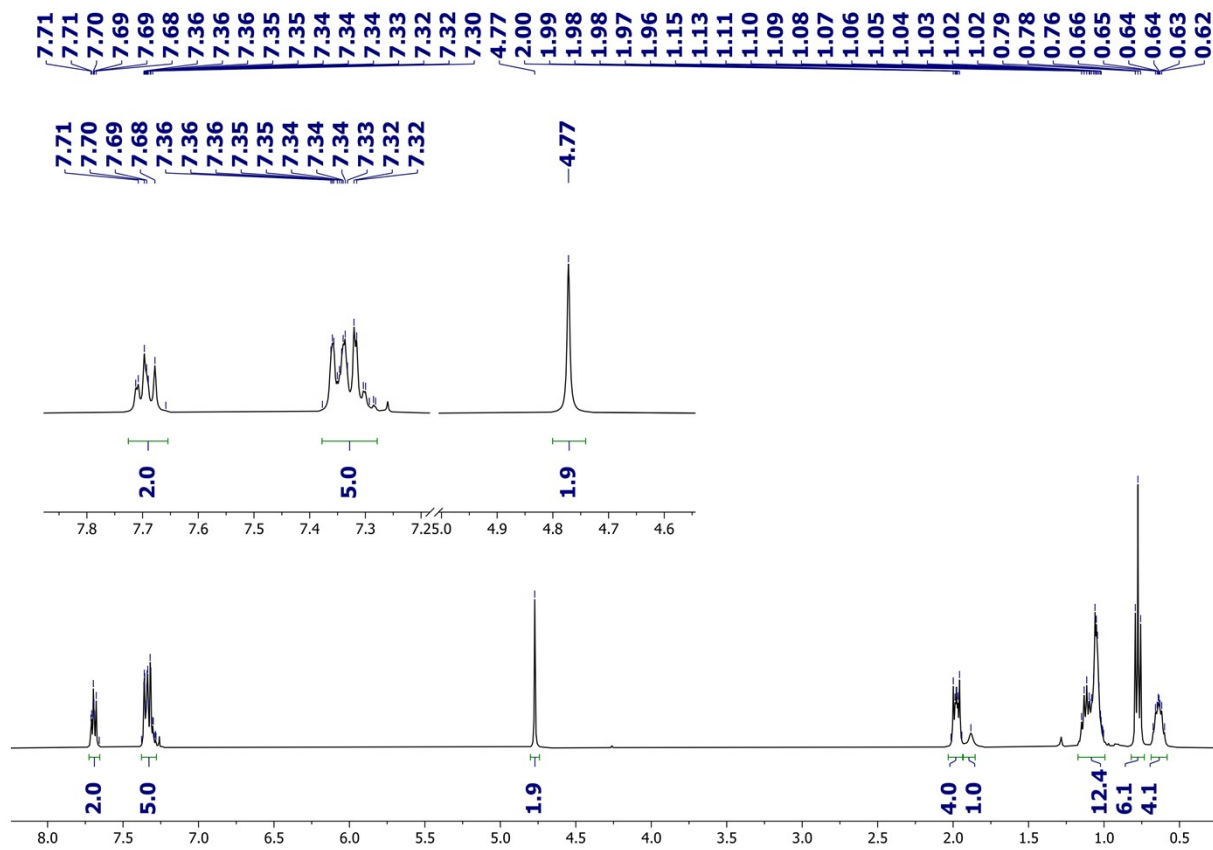

4'-((9,9-dihexyl-9H-fluoren-2-yl)methoxy)-2,2':6',2''-terpyridine (2Hex-flu-CH<sub>2</sub>O-tpy)

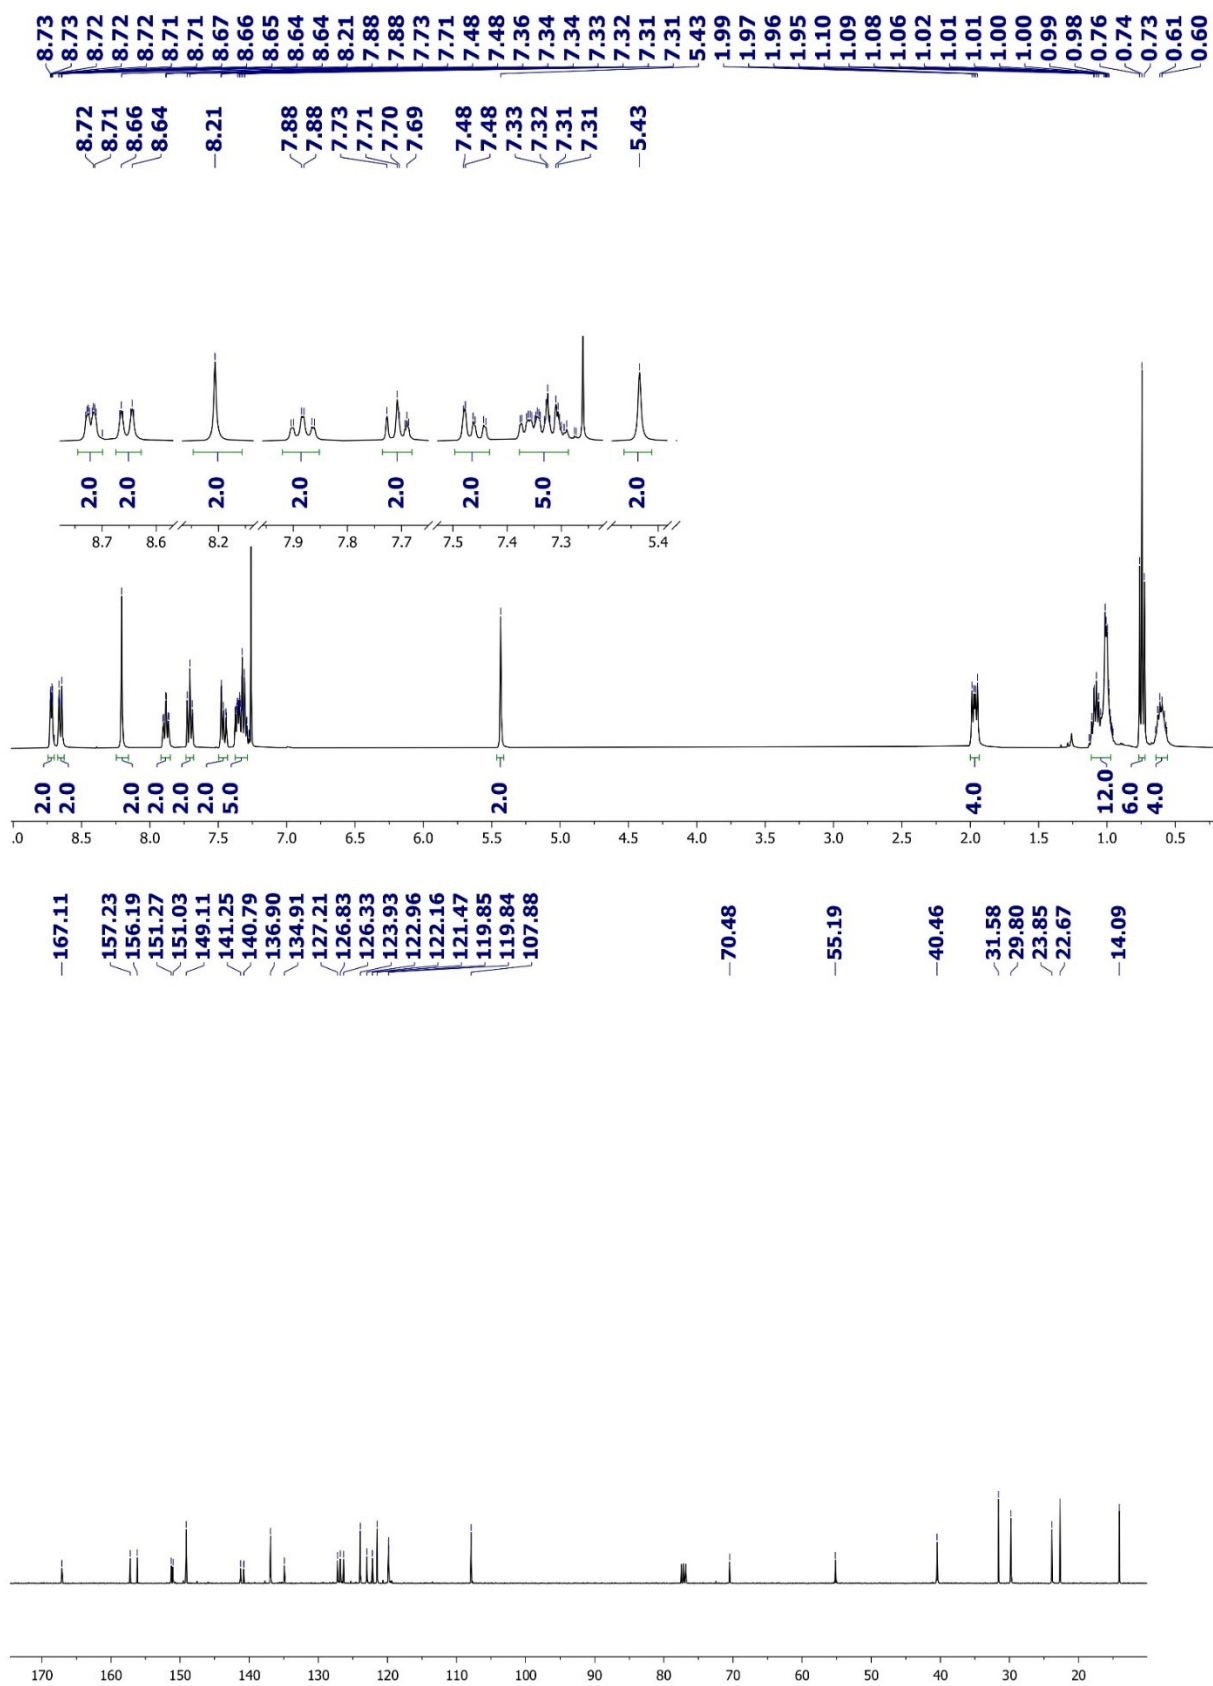

[Ru<sup>II</sup>(2Hex-flu-CH<sub>2</sub>O-tpy)(bpy)Cl](PF<sub>6</sub>)

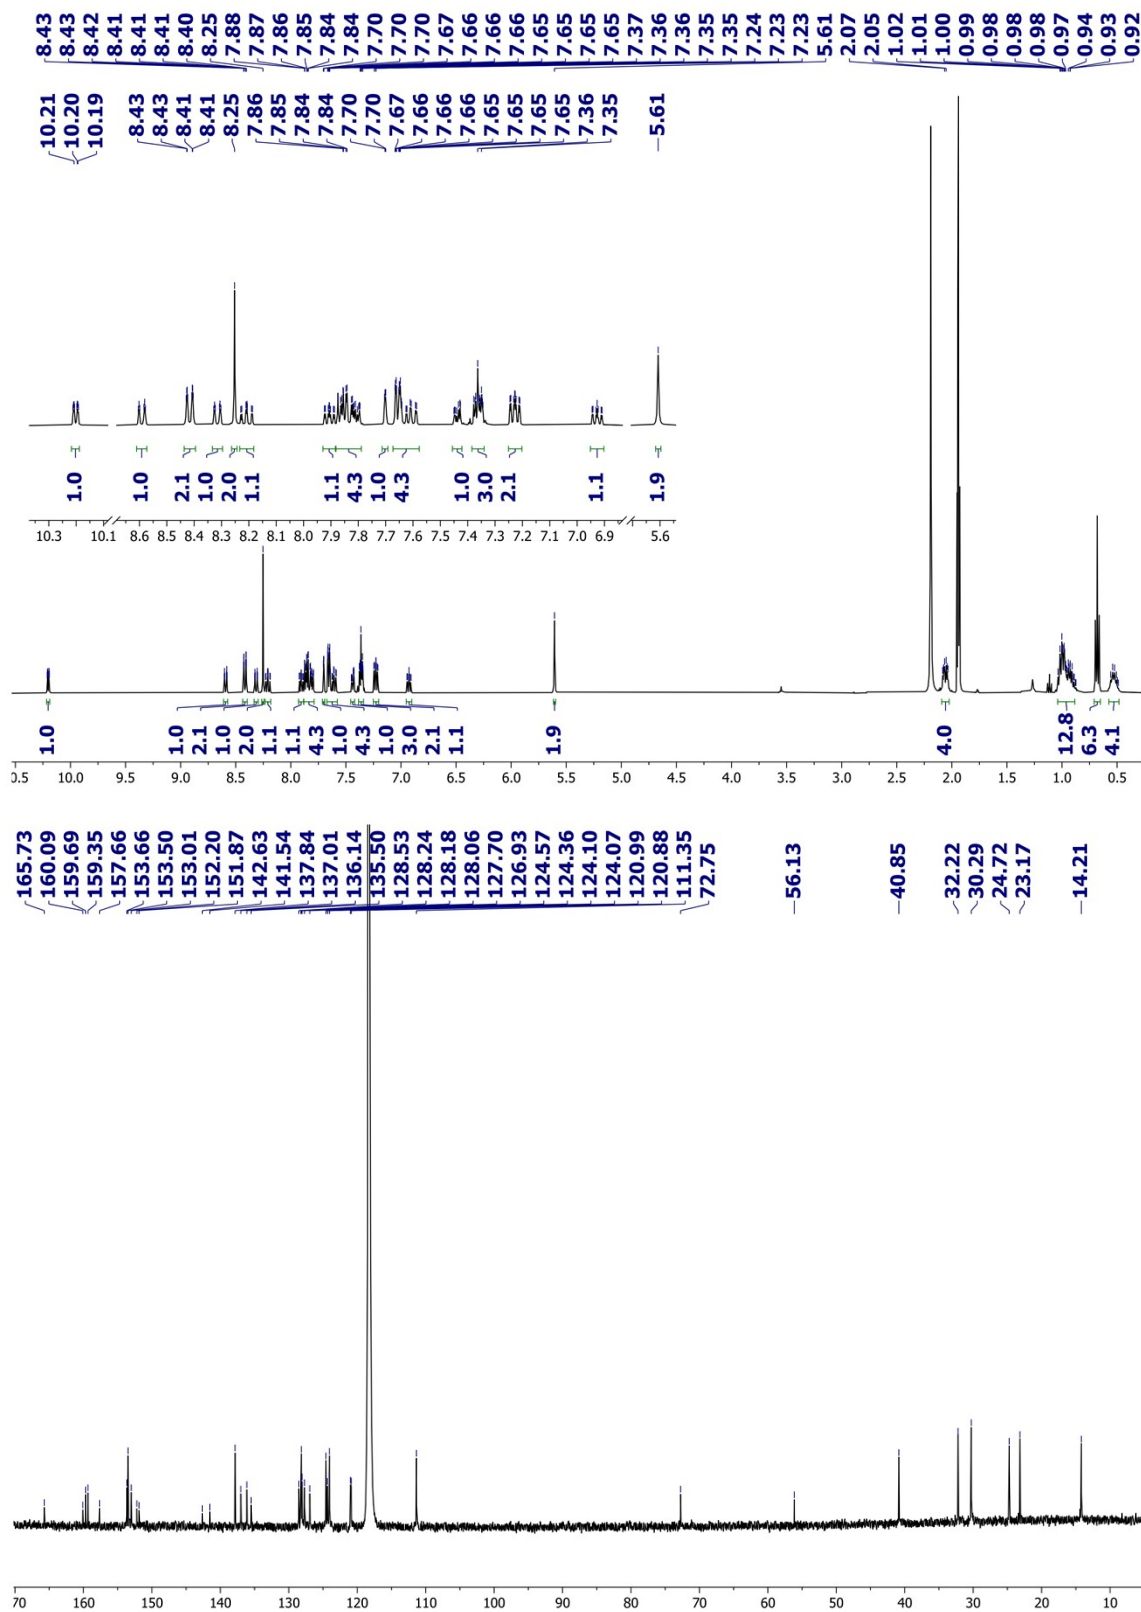

**[Ru<sup>II</sup>(2Hex-flu-CH<sub>2</sub>O-tpy)(bpy)(NO<sub>2</sub>)](PF<sub>6</sub>)**

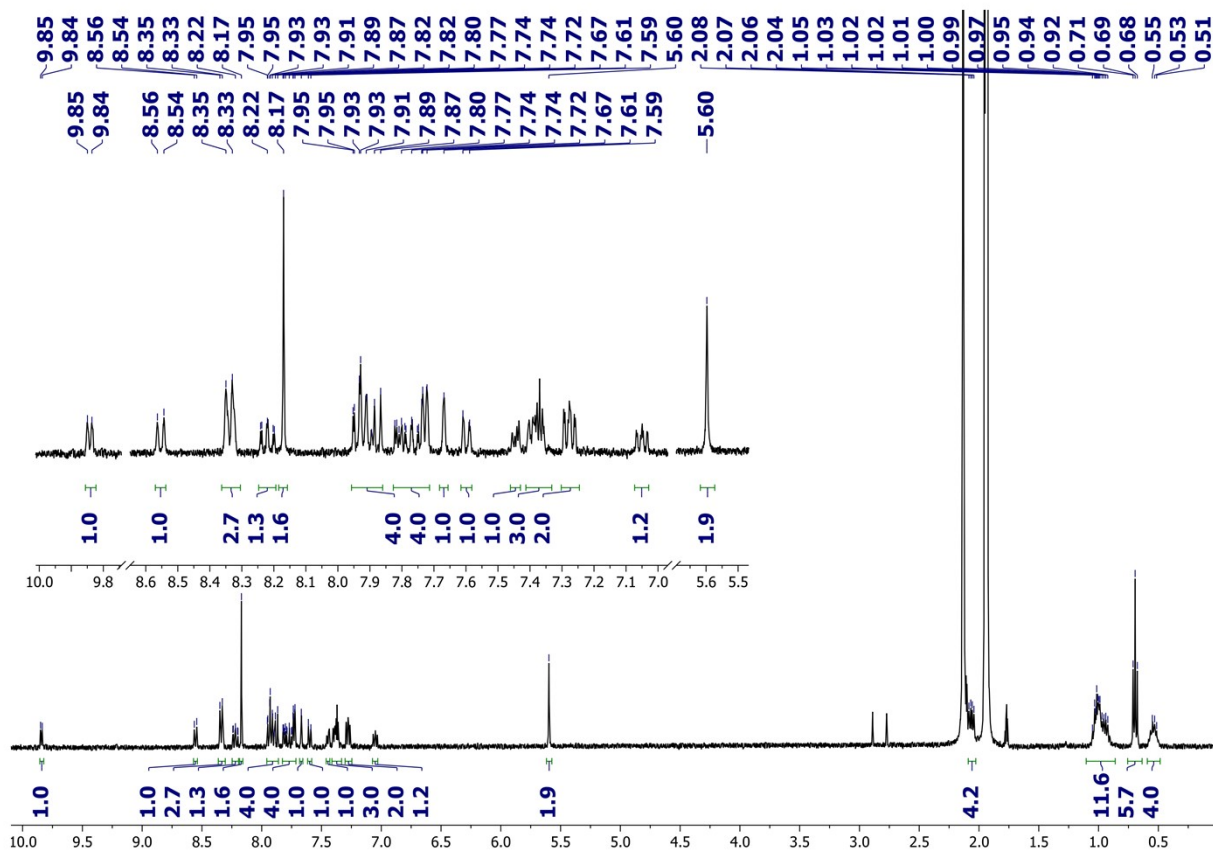

**[Ru<sup>II</sup>(2Hex-flu-CH<sub>2</sub>O-tpy)(bpy)(NO)](PF<sub>6</sub>)<sub>3</sub>**

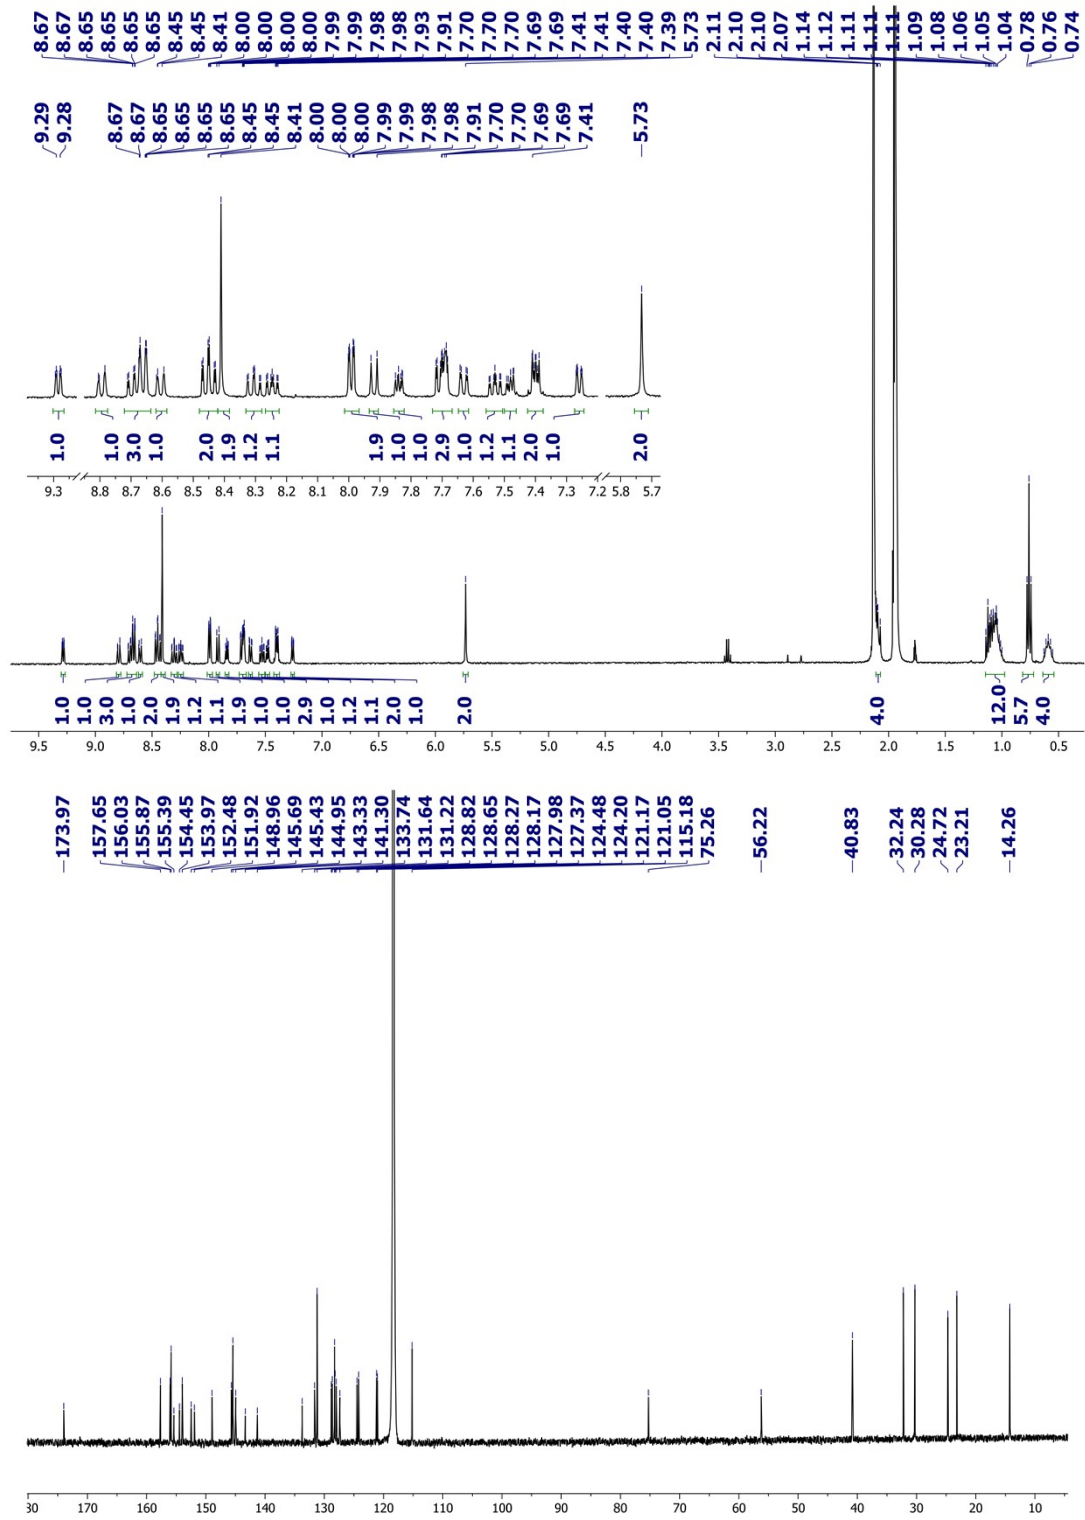

**[Ru<sup>II</sup>(MeO-tpy)(bpy)Cl](PF<sub>6</sub>)**

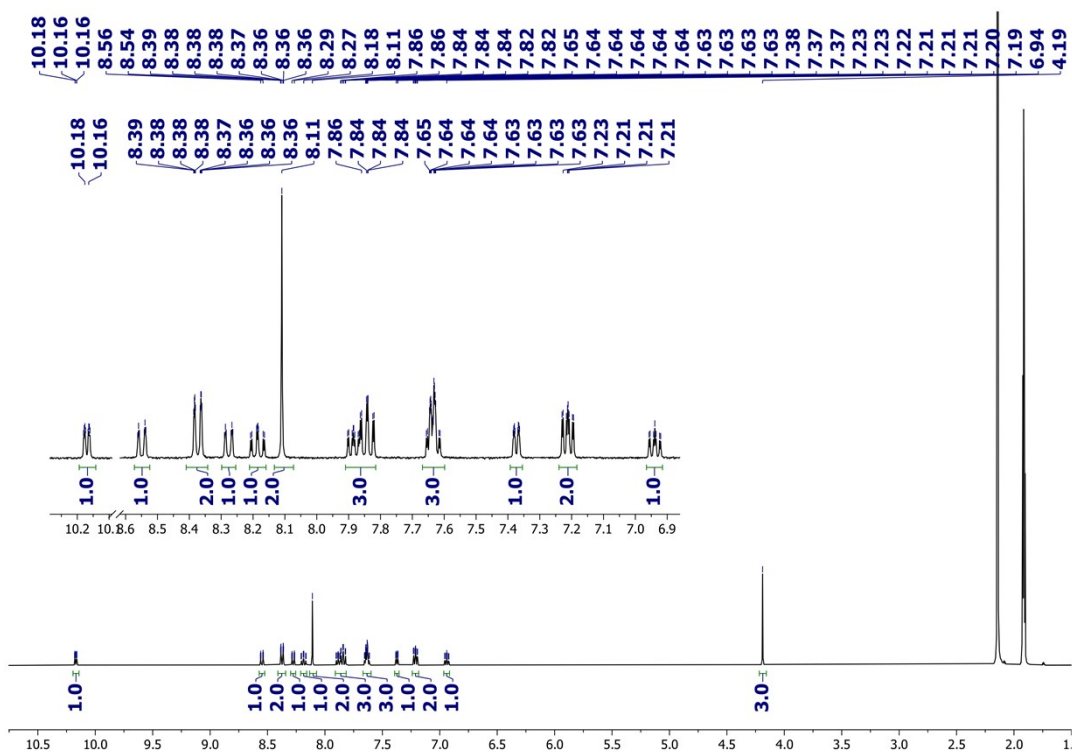





**[Ru<sup>II</sup>(MeO-tpy)(bpy)(NO)](PF<sub>6</sub>)<sub>3</sub>**

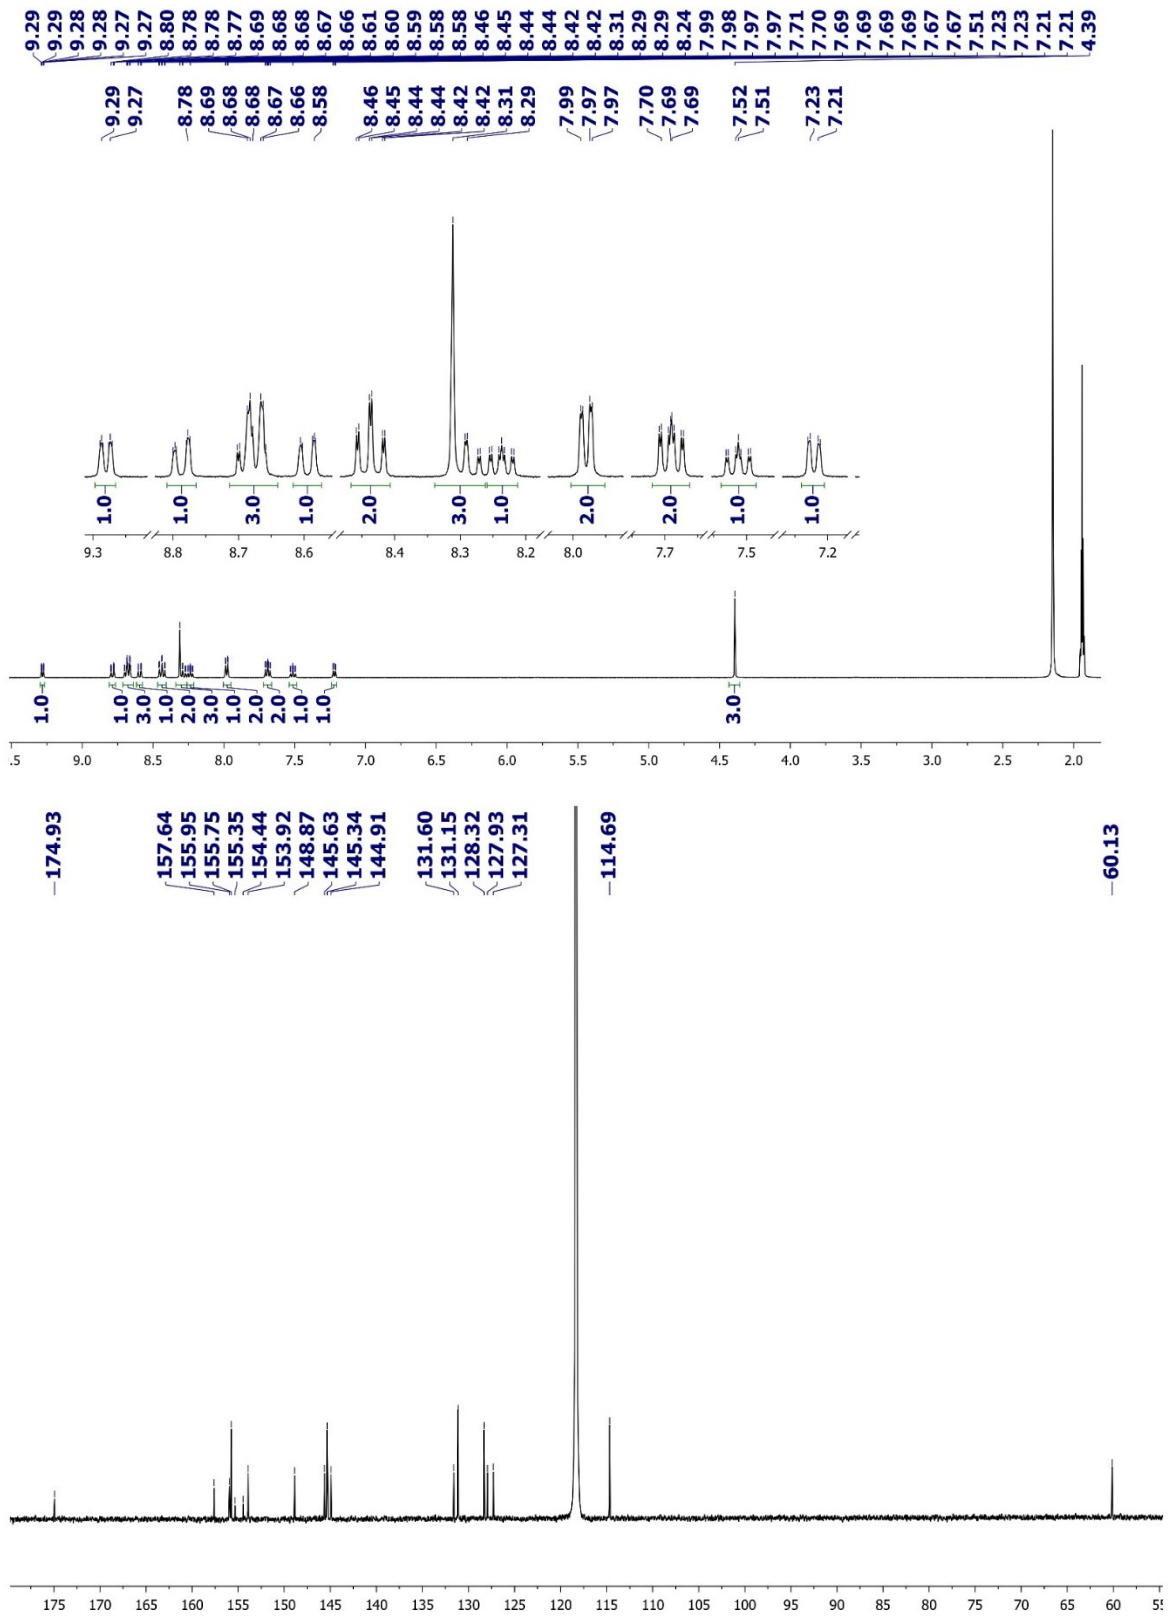

## 2. X-ray Data for [C<sub>51</sub>H<sub>53</sub>N<sub>6</sub>O<sub>3</sub>Ru] (PF<sub>6</sub>) (*5b*)

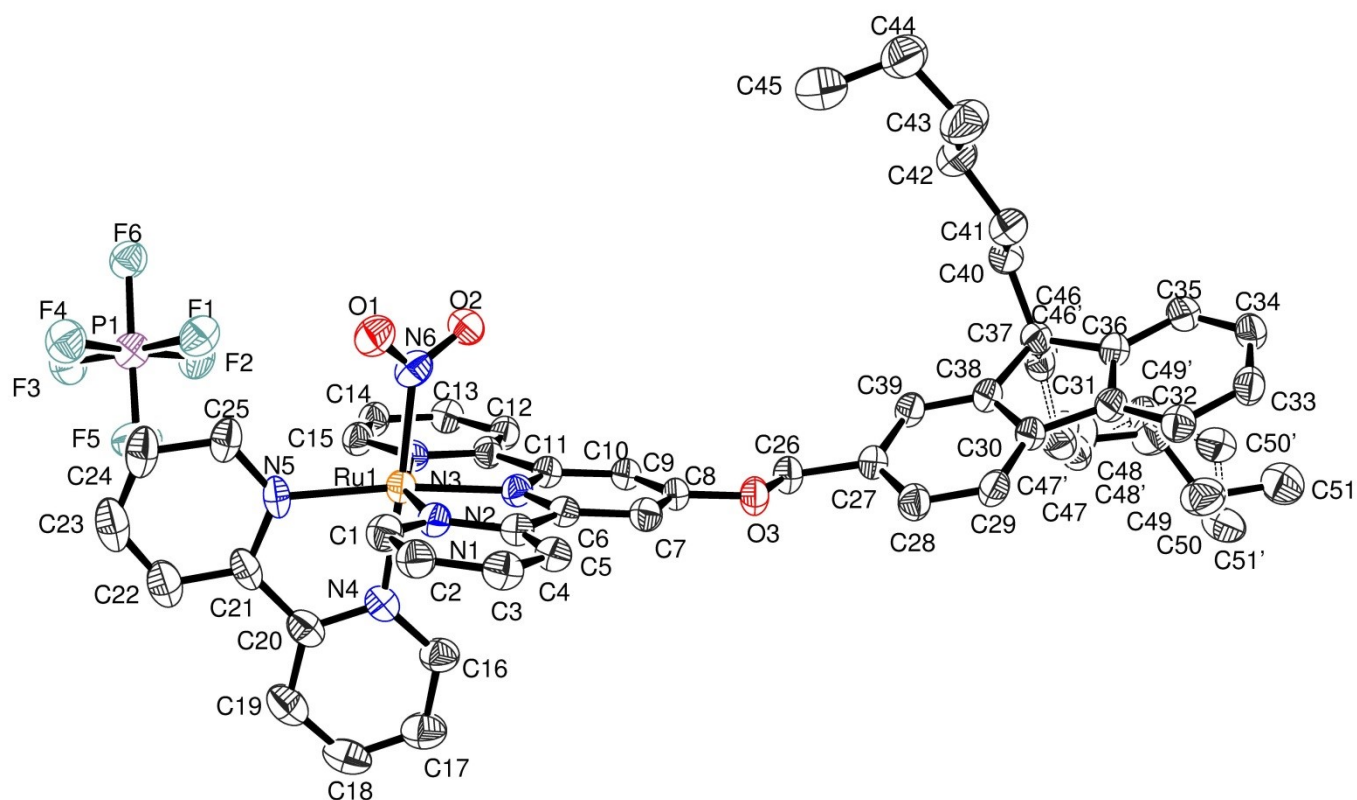

Figure 1 : Asymmetric Unit

Table 1. Crystal data and structure refinement

|                                 |                                                                                    |                         |
|---------------------------------|------------------------------------------------------------------------------------|-------------------------|
| Empirical formula               | C <sub>51</sub> H <sub>53</sub> N <sub>6</sub> O <sub>3</sub> Ru, P F <sub>6</sub> |                         |
| Formula weight                  | 1044.03                                                                            |                         |
| Temperature                     | 100(2) K                                                                           |                         |
| Wavelength                      | 1.54184 Å                                                                          |                         |
| Crystal system, space group     | Monoclinic, P 2 <sub>1</sub> /n                                                    |                         |
| Unit cell dimensions            | a = 13.2505(2) Å                                                                   | alpha = 90 deg.         |
|                                 | b = 11.0878(2) Å                                                                   | beta = 92.6550(10) deg. |
|                                 | c = 32.1285(4) Å                                                                   | gamma = 90 deg.         |
| Volume                          | 4715.22(13) Å <sup>3</sup>                                                         |                         |
| Z, Calculated density           | 4, 1.471 Mg/m <sup>3</sup>                                                         |                         |
| Absorption coefficient          | 3.642 mm <sup>-1</sup>                                                             |                         |
| F(000)                          | 2152                                                                               |                         |
| Theta range for data collection | 2.754 to 80.213 deg.                                                               |                         |

|                                   |                                             |
|-----------------------------------|---------------------------------------------|
| Limiting indices                  | -16<=h<=16, -10<=k<=13,<br>-40<=l<=40       |
| Reflections collected / unique    | 76605 / 10112 [R(int) = 0.0659]             |
| Completeness to theta = 67.684    | 100.0 %                                     |
| Refinement method                 | Full-matrix least-squares on F <sup>2</sup> |
| Data / restraints / parameters    | 10112 / 201 / 670                           |
| Goodness-of-fit on F <sup>2</sup> | 1.093                                       |
| Final R indices [I>2sigma(I)]     | R1 = 0.0520, wR2 = 0.1325                   |
| R indices (all data)              | R1 = 0.0702, wR2 = 0.1428                   |
| Largest diff. peak and hole       | 0.858 and -1.827 e.A <sup>-3</sup>          |

Table 2. Atomic coordinates (  $\times 10^4$ ) and equivalent isotropic displacement parameters ( $\text{Å}^2 \times 10^3$ ).  
 $U(\text{eq})$  is defined as one third of the trace of the orthogonalized  $U_{ij}$  tensor.

|         | x         | y         | z         | U (eq) |
|---------|-----------|-----------|-----------|--------|
| C (1)   | 4786 (3)  | 2966 (4)  | 6063 (1)  | 36 (1) |
| C (2)   | 5833 (3)  | 2922 (4)  | 6114 (1)  | 39 (1) |
| C (3)   | 6408 (3)  | 3030 (4)  | 5768 (1)  | 39 (1) |
| C (4)   | 5928 (3)  | 3201 (4)  | 5382 (1)  | 36 (1) |
| C (5)   | 4882 (3)  | 3230 (3)  | 5347 (1)  | 32 (1) |
| C (6)   | 4300 (3)  | 3420 (3)  | 4947 (1)  | 31 (1) |
| C (7)   | 4690 (3)  | 3603 (4)  | 4562 (1)  | 34 (1) |
| C (8)   | 4006 (3)  | 3793 (3)  | 4219 (1)  | 32 (1) |
| C (9)   | 2972 (3)  | 3769 (3)  | 4268 (1)  | 32 (1) |
| C (10)  | 2629 (3)  | 3587 (4)  | 4664 (1)  | 32 (1) |
| C (11)  | 1560 (3)  | 3535 (4)  | 4780 (1)  | 31 (1) |
| C (12)  | 750 (3)   | 3687 (4)  | 4499 (1)  | 36 (1) |
| C (13)  | -223 (3)  | 3632 (4)  | 4638 (1)  | 37 (1) |
| C (14)  | -360 (3)  | 3409 (4)  | 5054 (1)  | 37 (1) |
| C (15)  | 480 (3)   | 3266 (4)  | 5322 (1)  | 34 (1) |
| C (16)  | 2982 (3)  | 637 (4)   | 5168 (1)  | 41 (1) |
| C (17)  | 2925 (4)  | -602 (4)  | 5154 (2)  | 51 (1) |
| C (18)  | 2558 (4)  | -1220 (4) | 5488 (2)  | 55 (1) |
| C (19)  | 2254 (4)  | -565 (4)  | 5828 (2)  | 51 (1) |
| C (20)  | 2336 (3)  | 689 (4)   | 5831 (1)  | 40 (1) |
| C (21)  | 2077 (3)  | 1461 (4)  | 6181 (1)  | 41 (1) |
| C (22)  | 1718 (3)  | 1020 (5)  | 6548 (1)  | 52 (1) |
| C (23)  | 1549 (4)  | 1809 (5)  | 6867 (2)  | 58 (1) |
| C (24)  | 1744 (3)  | 3015 (5)  | 6821 (1)  | 51 (1) |
| C (25)  | 2096 (3)  | 3419 (5)  | 6443 (1)  | 42 (1) |
| C (26)  | 3816 (3)  | 4239 (4)  | 3490 (1)  | 36 (1) |
| C (27)  | 4482 (3)  | 4745 (4)  | 3166 (1)  | 35 (1) |
| C (28)  | 5502 (3)  | 4433 (4)  | 3163 (1)  | 39 (1) |
| C (29)  | 6121 (3)  | 4934 (4)  | 2873 (1)  | 37 (1) |
| C (30)  | 5716 (3)  | 5761 (4)  | 2586 (1)  | 33 (1) |
| C (31)  | 6179 (3)  | 6459 (4)  | 2259 (1)  | 35 (1) |
| C (32)  | 7168 (3)  | 6497 (4)  | 2131 (1)  | 39 (1) |
| C (33)  | 7396 (3)  | 7262 (4)  | 1806 (1)  | 41 (1) |
| C (34)  | 6657 (3)  | 7975 (4)  | 1611 (1)  | 42 (1) |
| C (35)  | 5670 (4)  | 7948 (4)  | 1739 (1)  | 43 (1) |
| C (36)  | 5436 (3)  | 7191 (4)  | 2066 (1)  | 36 (1) |
| C (37)  | 4422 (3)  | 7025 (4)  | 2263 (1)  | 37 (1) |
| C (46)  | 3570 (20) | 6660 (30) | 1940 (13) | 41 (5) |
| C (47)  | 3760 (30) | 5430 (20) | 1741 (8)  | 50 (5) |
| C (48)  | 3044 (16) | 5180 (20) | 1365 (5)  | 70 (5) |
| C (49)  | 3437 (15) | 5550 (20) | 955 (6)   | 71 (4) |
| C (50)  | 4253 (10) | 4750 (13) | 790 (3)   | 63 (3) |
| C (51)  | 4675 (8)  | 5220 (10) | 390 (3)   | 67 (3) |
| C (46') | 3630 (30) | 6520 (40) | 1941 (14) | 43 (5) |
| C (47') | 3810 (30) | 5290 (20) | 1749 (8)  | 46 (5) |
| C (48') | 3105 (16) | 4999 (18) | 1373 (5)  | 44 (4) |

|         |           |           |          |        |
|---------|-----------|-----------|----------|--------|
| C (49') | 3240 (17) | 5770 (20) | 991 (7)  | 62 (4) |
| C (50') | 4230 (9)  | 5641 (11) | 774 (4)  | 61 (3) |
| C (51') | 4444 (12) | 4364 (11) | 658 (5)  | 59 (4) |
| C (38)  | 4688 (3)  | 6067 (4)  | 2587 (1) | 34 (1) |
| C (39)  | 4071 (3)  | 5561 (4)  | 2876 (1) | 34 (1) |
| C (40)  | 4086 (3)  | 8192 (4)  | 2479 (1) | 45 (1) |
| C (41)  | 4895 (4)  | 8769 (5)  | 2768 (2) | 52 (1) |
| C (42)  | 4504 (4)  | 9668 (5)  | 3077 (2) | 57 (1) |
| C (43)  | 5346 (4)  | 10294 (6) | 3340 (2) | 73 (2) |
| C (44)  | 4998 (4)  | 11075 (5) | 3695 (2) | 66 (2) |
| C (45)  | 4699 (4)  | 10360 (5) | 4066 (2) | 62 (1) |
| N (1)   | 4312 (2)  | 3103 (3)  | 5688 (1) | 32 (1) |
| N (2)   | 3289 (2)  | 3411 (3)  | 4989 (1) | 31 (1) |
| N (3)   | 1424 (2)  | 3319 (3)  | 5194 (1) | 30 (1) |
| N (4)   | 2698 (2)  | 1288 (3)  | 5499 (1) | 35 (1) |
| N (5)   | 2252 (2)  | 2667 (3)  | 6128 (1) | 36 (1) |
| N (6)   | 2811 (2)  | 4987 (3)  | 5622 (1) | 39 (1) |
| O (1)   | 3115 (2)  | 5474 (3)  | 5952 (1) | 48 (1) |
| O (2)   | 2587 (2)  | 5682 (3)  | 5315 (1) | 41 (1) |
| O (3)   | 4447 (2)  | 4003 (3)  | 3857 (1) | 37 (1) |
| F (1)   | 91 (2)    | 4520 (2)  | 6288 (1) | 46 (1) |
| F (2)   | -1363 (2) | 3859 (2)  | 5977 (1) | 47 (1) |
| F (3)   | -1966 (2) | 3390 (2)  | 6605 (1) | 51 (1) |
| F (4)   | -499 (2)  | 4060 (3)  | 6920 (1) | 52 (1) |
| F (5)   | -462 (2)  | 2632 (3)  | 6417 (1) | 57 (1) |
| F (6)   | -1403 (2) | 5277 (2)  | 6479 (1) | 43 (1) |
| P (1)   | -927 (1)  | 3938 (1)  | 6454 (1) | 40 (1) |
| Ru (1)  | 2771 (1)  | 3153 (1)  | 5546 (1) | 30 (1) |

---

Table 3. Bond lengths [Å] and angles [deg].

---

|             |          |
|-------------|----------|
| C(1)-N(1)   | 1.342(5) |
| C(1)-C(2)   | 1.389(6) |
| C(1)-H(1)   | 0.9500   |
| C(2)-C(3)   | 1.380(6) |
| C(2)-H(2)   | 0.9500   |
| C(3)-C(4)   | 1.382(6) |
| C(3)-H(3)   | 0.9500   |
| C(4)-C(5)   | 1.386(5) |
| C(4)-H(4)   | 0.9500   |
| C(5)-N(1)   | 1.367(5) |
| C(5)-C(6)   | 1.482(5) |
| C(6)-N(2)   | 1.353(5) |
| C(6)-C(7)   | 1.378(5) |
| C(7)-C(8)   | 1.407(5) |
| C(7)-H(7)   | 0.9500   |
| C(8)-O(3)   | 1.348(4) |
| C(8)-C(9)   | 1.387(5) |
| C(9)-C(10)  | 1.385(5) |
| C(9)-H(9)   | 0.9500   |
| C(10)-N(2)  | 1.345(5) |
| C(10)-C(11) | 1.481(5) |
| C(11)-N(3)  | 1.372(5) |
| C(11)-C(12) | 1.380(5) |
| C(12)-C(13) | 1.384(5) |
| C(12)-H(12) | 0.9500   |
| C(13)-C(14) | 1.381(5) |
| C(13)-H(13) | 0.9500   |
| C(14)-C(15) | 1.383(5) |
| C(14)-H(14) | 0.9500   |
| C(15)-N(3)  | 1.336(5) |
| C(15)-H(15) | 0.9500   |
| C(16)-N(4)  | 1.352(5) |
| C(16)-C(17) | 1.377(6) |
| C(16)-H(16) | 0.9500   |
| C(17)-C(18) | 1.381(7) |
| C(17)-H(17) | 0.9500   |
| C(18)-C(19) | 1.386(7) |
| C(18)-H(18) | 0.9500   |
| C(19)-C(20) | 1.396(7) |
| C(19)-H(19) | 0.9500   |
| C(20)-N(4)  | 1.360(5) |
| C(20)-C(21) | 1.467(6) |
| C(21)-N(5)  | 1.369(6) |
| C(21)-C(22) | 1.381(6) |
| C(22)-C(23) | 1.375(8) |
| C(22)-H(22) | 0.9500   |
| C(23)-C(24) | 1.371(7) |
| C(23)-H(23) | 0.9500   |
| C(24)-C(25) | 1.395(6) |
| C(24)-H(24) | 0.9500   |
| C(25)-N(5)  | 1.336(5) |
| C(25)-H(25) | 0.9500   |
| C(26)-O(3)  | 1.438(4) |
| C(26)-C(27) | 1.505(5) |

|                  |            |
|------------------|------------|
| C (26) -H (26A)  | 0.9900     |
| C (26) -H (26B)  | 0.9900     |
| C (27) -C (39)   | 1.390 (5)  |
| C (27) -C (28)   | 1.395 (5)  |
| C (28) -C (29)   | 1.387 (5)  |
| C (28) -H (28)   | 0.9500     |
| C (29) -C (30)   | 1.391 (5)  |
| C (29) -H (29)   | 0.9500     |
| C (30) -C (38)   | 1.403 (5)  |
| C (30) -C (31)   | 1.463 (5)  |
| C (31) -C (32)   | 1.391 (5)  |
| C (31) -C (36)   | 1.399 (6)  |
| C (32) -C (33)   | 1.389 (6)  |
| C (32) -H (32)   | 0.9500     |
| C (33) -C (34)   | 1.386 (6)  |
| C (33) -H (33)   | 0.9500     |
| C (34) -C (35)   | 1.389 (6)  |
| C (34) -H (34)   | 0.9500     |
| C (35) -C (36)   | 1.390 (6)  |
| C (35) -H (35)   | 0.9500     |
| C (36) -C (37)   | 1.523 (5)  |
| C (37) -C (38)   | 1.516 (5)  |
| C (37) -C (40)   | 1.544 (6)  |
| C (37) -C (46')  | 1.549 (13) |
| C (37) -C (46)   | 1.553 (11) |
| C (46) -C (47)   | 1.529 (12) |
| C (46) -H (46A)  | 0.9900     |
| C (46) -H (46B)  | 0.9900     |
| C (47) -C (48)   | 1.527 (11) |
| C (47) -H (47A)  | 0.9900     |
| C (47) -H (47B)  | 0.9900     |
| C (48) -C (49)   | 1.500 (13) |
| C (48) -H (48A)  | 0.9900     |
| C (48) -H (48B)  | 0.9900     |
| C (49) -C (50)   | 1.516 (14) |
| C (49) -H (49A)  | 0.9900     |
| C (49) -H (49B)  | 0.9900     |
| C (50) -C (51)   | 1.517 (12) |
| C (50) -H (50A)  | 0.9900     |
| C (50) -H (50B)  | 0.9900     |
| C (51) -H (51A)  | 0.9800     |
| C (51) -H (51B)  | 0.9800     |
| C (51) -H (51C)  | 0.9800     |
| C (46') -C (47') | 1.519 (13) |
| C (46') -H (46C) | 0.9900     |
| C (46') -H (46D) | 0.9900     |
| C (47') -C (48') | 1.531 (13) |
| C (47') -H (47C) | 0.9900     |
| C (47') -H (47D) | 0.9900     |
| C (48') -C (49') | 1.513 (13) |
| C (48') -H (48C) | 0.9900     |
| C (48') -H (48D) | 0.9900     |
| C (49') -C (50') | 1.521 (14) |
| C (49') -H (49C) | 0.9900     |
| C (49') -H (49D) | 0.9900     |
| C (50') -C (51') | 1.495 (12) |
| C (50') -H (50C) | 0.9900     |
| C (50') -H (50D) | 0.9900     |

|                     |           |
|---------------------|-----------|
| C (51') -H (51D)    | 0.9800    |
| C (51') -H (51E)    | 0.9800    |
| C (51') -H (51F)    | 0.9800    |
| C (38) -C (39)      | 1.386 (5) |
| C (39) -H (39)      | 0.9500    |
| C (40) -C (41)      | 1.526 (7) |
| C (40) -H (40A)     | 0.9900    |
| C (40) -H (40B)     | 0.9900    |
| C (41) -C (42)      | 1.514 (6) |
| C (41) -H (41A)     | 0.9900    |
| C (41) -H (41B)     | 0.9900    |
| C (42) -C (43)      | 1.534 (8) |
| C (42) -H (42A)     | 0.9900    |
| C (42) -H (42B)     | 0.9900    |
| C (43) -C (44)      | 1.522 (7) |
| C (43) -H (43A)     | 0.9900    |
| C (43) -H (43B)     | 0.9900    |
| C (44) -C (45)      | 1.499 (8) |
| C (44) -H (44A)     | 0.9900    |
| C (44) -H (44B)     | 0.9900    |
| C (45) -H (45A)     | 0.9800    |
| C (45) -H (45B)     | 0.9800    |
| C (45) -H (45C)     | 0.9800    |
| N (1) -Ru (1)       | 2.073 (3) |
| N (2) -Ru (1)       | 1.969 (3) |
| N (3) -Ru (1)       | 2.077 (3) |
| N (4) -Ru (1)       | 2.075 (3) |
| N (5) -Ru (1)       | 2.091 (3) |
| N (6) -O (1)        | 1.241 (4) |
| N (6) -O (2)        | 1.275 (4) |
| N (6) -Ru (1)       | 2.049 (4) |
| F (1) -P (1)        | 1.608 (3) |
| F (2) -P (1)        | 1.614 (3) |
| F (3) -P (1)        | 1.600 (3) |
| F (4) -P (1)        | 1.583 (3) |
| F (5) -P (1)        | 1.580 (3) |
| F (6) -P (1)        | 1.617 (3) |
|                     |           |
| N (1) -C (1) -C (2) | 122.1 (4) |
| N (1) -C (1) -H (1) | 118.9     |
| C (2) -C (1) -H (1) | 118.9     |
| C (3) -C (2) -C (1) | 119.2 (4) |
| C (3) -C (2) -H (2) | 120.4     |
| C (1) -C (2) -H (2) | 120.4     |
| C (2) -C (3) -C (4) | 119.1 (4) |
| C (2) -C (3) -H (3) | 120.4     |
| C (4) -C (3) -H (3) | 120.4     |
| C (3) -C (4) -C (5) | 119.5 (4) |
| C (3) -C (4) -H (4) | 120.2     |
| C (5) -C (4) -H (4) | 120.2     |
| N (1) -C (5) -C (4) | 121.4 (3) |
| N (1) -C (5) -C (6) | 115.1 (3) |
| C (4) -C (5) -C (6) | 123.5 (3) |
| N (2) -C (6) -C (7) | 120.3 (3) |
| N (2) -C (6) -C (5) | 113.0 (3) |
| C (7) -C (6) -C (5) | 126.7 (3) |
| C (6) -C (7) -C (8) | 118.0 (3) |
| C (6) -C (7) -H (7) | 121.0     |



|                         |           |
|-------------------------|-----------|
| C (8) -C (7) -H (7)     | 121.0     |
| O (3) -C (8) -C (9)     | 124.8 (3) |
| O (3) -C (8) -C (7)     | 114.4 (3) |
| C (9) -C (8) -C (7)     | 120.9 (3) |
| C (10) -C (9) -C (8)    | 118.3 (3) |
| C (10) -C (9) -H (9)    | 120.9     |
| C (8) -C (9) -H (9)     | 120.9     |
| N (2) -C (10) -C (9)    | 120.3 (3) |
| N (2) -C (10) -C (11)   | 113.2 (3) |
| C (9) -C (10) -C (11)   | 126.5 (3) |
| N (3) -C (11) -C (12)   | 121.4 (3) |
| N (3) -C (11) -C (10)   | 114.9 (3) |
| C (12) -C (11) -C (10)  | 123.7 (3) |
| C (11) -C (12) -C (13)  | 119.5 (4) |
| C (11) -C (12) -H (12)  | 120.2     |
| C (13) -C (12) -H (12)  | 120.2     |
| C (14) -C (13) -C (12)  | 119.0 (4) |
| C (14) -C (13) -H (13)  | 120.5     |
| C (12) -C (13) -H (13)  | 120.5     |
| C (13) -C (14) -C (15)  | 119.0 (4) |
| C (13) -C (14) -H (14)  | 120.5     |
| C (15) -C (14) -H (14)  | 120.5     |
| N (3) -C (15) -C (14)   | 122.7 (4) |
| N (3) -C (15) -H (15)   | 118.6     |
| C (14) -C (15) -H (15)  | 118.6     |
| N (4) -C (16) -C (17)   | 122.8 (4) |
| N (4) -C (16) -H (16)   | 118.6     |
| C (17) -C (16) -H (16)  | 118.6     |
| C (16) -C (17) -C (18)  | 119.3 (5) |
| C (16) -C (17) -H (17)  | 120.3     |
| C (18) -C (17) -H (17)  | 120.3     |
| C (17) -C (18) -C (19)  | 118.6 (5) |
| C (17) -C (18) -H (18)  | 120.7     |
| C (19) -C (18) -H (18)  | 120.7     |
| C (18) -C (19) -C (20)  | 120.1 (4) |
| C (18) -C (19) -H (19)  | 119.9     |
| C (20) -C (19) -H (19)  | 119.9     |
| N (4) -C (20) -C (19)   | 120.8 (4) |
| N (4) -C (20) -C (21)   | 114.8 (4) |
| C (19) -C (20) -C (21)  | 124.4 (4) |
| N (5) -C (21) -C (22)   | 121.3 (4) |
| N (5) -C (21) -C (20)   | 115.3 (3) |
| C (22) -C (21) -C (20)  | 123.4 (4) |
| C (23) -C (22) -C (21)  | 119.0 (5) |
| C (23) -C (22) -H (22)  | 120.5     |
| C (21) -C (22) -H (22)  | 120.5     |
| C (24) -C (23) -C (22)  | 120.2 (4) |
| C (24) -C (23) -H (23)  | 119.9     |
| C (22) -C (23) -H (23)  | 119.9     |
| C (23) -C (24) -C (25)  | 118.6 (5) |
| C (23) -C (24) -H (24)  | 120.7     |
| C (25) -C (24) -H (24)  | 120.7     |
| N (5) -C (25) -C (24)   | 122.0 (5) |
| N (5) -C (25) -H (25)   | 119.0     |
| C (24) -C (25) -H (25)  | 119.0     |
| O (3) -C (26) -C (27)   | 107.2 (3) |
| O (3) -C (26) -H (26A)  | 110.3     |
| C (27) -C (26) -H (26A) | 110.3     |

|                          |            |
|--------------------------|------------|
| O (3) -C (26) -H (26B)   | 110.3      |
| C (27) -C (26) -H (26B)  | 110.3      |
| H (26A) -C (26) -H (26B) | 108.5      |
| C (39) -C (27) -C (28)   | 120.4 (4)  |
| C (39) -C (27) -C (26)   | 118.7 (3)  |
| C (28) -C (27) -C (26)   | 120.8 (3)  |
| C (29) -C (28) -C (27)   | 120.6 (4)  |
| C (29) -C (28) -H (28)   | 119.7      |
| C (27) -C (28) -H (28)   | 119.7      |
| C (28) -C (29) -C (30)   | 119.2 (4)  |
| C (28) -C (29) -H (29)   | 120.4      |
| C (30) -C (29) -H (29)   | 120.4      |
| C (29) -C (30) -C (38)   | 120.2 (3)  |
| C (29) -C (30) -C (31)   | 131.5 (4)  |
| C (38) -C (30) -C (31)   | 108.3 (3)  |
| C (32) -C (31) -C (36)   | 120.3 (4)  |
| C (32) -C (31) -C (30)   | 131.3 (4)  |
| C (36) -C (31) -C (30)   | 108.4 (3)  |
| C (33) -C (32) -C (31)   | 118.7 (4)  |
| C (33) -C (32) -H (32)   | 120.6      |
| C (31) -C (32) -H (32)   | 120.6      |
| C (34) -C (33) -C (32)   | 121.0 (4)  |
| C (34) -C (33) -H (33)   | 119.5      |
| C (32) -C (33) -H (33)   | 119.5      |
| C (33) -C (34) -C (35)   | 120.6 (4)  |
| C (33) -C (34) -H (34)   | 119.7      |
| C (35) -C (34) -H (34)   | 119.7      |
| C (34) -C (35) -C (36)   | 118.8 (4)  |
| C (34) -C (35) -H (35)   | 120.6      |
| C (36) -C (35) -H (35)   | 120.6      |
| C (35) -C (36) -C (31)   | 120.6 (4)  |
| C (35) -C (36) -C (37)   | 128.2 (4)  |
| C (31) -C (36) -C (37)   | 111.2 (3)  |
| C (38) -C (37) -C (36)   | 100.9 (3)  |
| C (38) -C (37) -C (40)   | 110.0 (3)  |
| C (36) -C (37) -C (40)   | 111.3 (4)  |
| C (38) -C (37) -C (46')  | 110 (2)    |
| C (36) -C (37) -C (46')  | 111 (2)    |
| C (40) -C (37) -C (46')  | 113.7 (12) |
| C (38) -C (37) -C (46)   | 114.4 (19) |
| C (36) -C (37) -C (46)   | 112 (2)    |
| C (40) -C (37) -C (46)   | 107.7 (10) |
| C (47) -C (46) -C (37)   | 112.5 (14) |
| C (47) -C (46) -H (46A)  | 109.1      |
| C (37) -C (46) -H (46A)  | 109.1      |
| C (47) -C (46) -H (46B)  | 109.1      |
| C (37) -C (46) -H (46B)  | 109.1      |
| H (46A) -C (46) -H (46B) | 107.8      |
| C (48) -C (47) -C (46)   | 112.5 (13) |
| C (48) -C (47) -H (47A)  | 109.1      |
| C (46) -C (47) -H (47A)  | 109.1      |
| C (48) -C (47) -H (47B)  | 109.1      |
| C (46) -C (47) -H (47B)  | 109.1      |
| H (47A) -C (47) -H (47B) | 107.8      |
| C (49) -C (48) -C (47)   | 114.6 (15) |
| C (49) -C (48) -H (48A)  | 108.6      |
| C (47) -C (48) -H (48A)  | 108.6      |
| C (49) -C (48) -H (48B)  | 108.6      |

|                           |            |
|---------------------------|------------|
| C (47) -C (48) -H (48B)   | 108.6      |
| H (48A) -C (48) -H (48B)  | 107.6      |
| C (48) -C (49) -C (50)    | 115.3 (14) |
| C (48) -C (49) -H (49A)   | 108.4      |
| C (50) -C (49) -H (49A)   | 108.4      |
| C (48) -C (49) -H (49B)   | 108.5      |
| C (50) -C (49) -H (49B)   | 108.5      |
| H (49A) -C (49) -H (49B)  | 107.5      |
| C (49) -C (50) -C (51)    | 113.0 (12) |
| C (49) -C (50) -H (50A)   | 109.0      |
| C (51) -C (50) -H (50A)   | 109.0      |
| C (49) -C (50) -H (50B)   | 109.0      |
| C (51) -C (50) -H (50B)   | 109.0      |
| H (50A) -C (50) -H (50B)  | 107.8      |
| C (50) -C (51) -H (51A)   | 109.5      |
| C (50) -C (51) -H (51B)   | 109.5      |
| H (51A) -C (51) -H (51B)  | 109.5      |
| C (50) -C (51) -H (51C)   | 109.5      |
| H (51A) -C (51) -H (51C)  | 109.5      |
| H (51B) -C (51) -H (51C)  | 109.5      |
| C (47') -C (46') -C (37)  | 118.4 (17) |
| C (47') -C (46') -H (46C) | 107.7      |
| C (37) -C (46') -H (46C)  | 107.7      |
| C (47') -C (46') -H (46D) | 107.7      |
| C (37) -C (46') -H (46D)  | 107.7      |
| H (46C) -C (46') -H (46D) | 107.1      |
| C (46') -C (47') -C (48') | 113.9 (16) |
| C (46') -C (47') -H (47C) | 108.8      |
| C (48') -C (47') -H (47C) | 108.8      |
| C (46') -C (47') -H (47D) | 108.8      |
| C (48') -C (47') -H (47D) | 108.8      |
| H (47C) -C (47') -H (47D) | 107.7      |
| C (49') -C (48') -C (47') | 115.4 (15) |
| C (49') -C (48') -H (48C) | 108.4      |
| C (47') -C (48') -H (48C) | 108.4      |
| C (49') -C (48') -H (48D) | 108.4      |
| C (47') -C (48') -H (48D) | 108.4      |
| H (48C) -C (48') -H (48D) | 107.5      |
| C (48') -C (49') -C (50') | 117.0 (15) |
| C (48') -C (49') -H (49C) | 108.1      |
| C (50') -C (49') -H (49C) | 108.1      |
| C (48') -C (49') -H (49D) | 108.0      |
| C (50') -C (49') -H (49D) | 108.0      |
| H (49C) -C (49') -H (49D) | 107.3      |
| C (51') -C (50') -C (49') | 112.5 (13) |
| C (51') -C (50') -H (50C) | 109.1      |
| C (49') -C (50') -H (50C) | 109.1      |
| C (51') -C (50') -H (50D) | 109.1      |
| C (49') -C (50') -H (50D) | 109.1      |
| H (50C) -C (50') -H (50D) | 107.8      |
| C (50') -C (51') -H (51D) | 109.5      |
| C (50') -C (51') -H (51E) | 109.5      |
| H (51D) -C (51') -H (51E) | 109.5      |
| C (50') -C (51') -H (51F) | 109.5      |
| H (51D) -C (51') -H (51F) | 109.5      |
| H (51E) -C (51') -H (51F) | 109.5      |
| C (39) -C (38) -C (30)    | 120.4 (4)  |
| C (39) -C (38) -C (37)    | 128.2 (4)  |

|                          |           |
|--------------------------|-----------|
| C (30) -C (38) -C (37)   | 111.3 (3) |
| C (38) -C (39) -C (27)   | 119.2 (3) |
| C (38) -C (39) -H (39)   | 120.4     |
| C (27) -C (39) -H (39)   | 120.4     |
| C (41) -C (40) -C (37)   | 114.6 (4) |
| C (41) -C (40) -H (40A)  | 108.6     |
| C (37) -C (40) -H (40A)  | 108.6     |
| C (41) -C (40) -H (40B)  | 108.6     |
| C (37) -C (40) -H (40B)  | 108.6     |
| H (40A) -C (40) -H (40B) | 107.6     |
| C (42) -C (41) -C (40)   | 115.0 (4) |
| C (42) -C (41) -H (41A)  | 108.5     |
| C (40) -C (41) -H (41A)  | 108.5     |
| C (42) -C (41) -H (41B)  | 108.5     |
| C (40) -C (41) -H (41B)  | 108.5     |
| H (41A) -C (41) -H (41B) | 107.5     |
| C (41) -C (42) -C (43)   | 113.4 (4) |
| C (41) -C (42) -H (42A)  | 108.9     |
| C (43) -C (42) -H (42A)  | 108.9     |
| C (41) -C (42) -H (42B)  | 108.9     |
| C (43) -C (42) -H (42B)  | 108.9     |
| H (42A) -C (42) -H (42B) | 107.7     |
| C (44) -C (43) -C (42)   | 115.7 (5) |
| C (44) -C (43) -H (43A)  | 108.4     |
| C (42) -C (43) -H (43A)  | 108.4     |
| C (44) -C (43) -H (43B)  | 108.4     |
| C (42) -C (43) -H (43B)  | 108.4     |
| H (43A) -C (43) -H (43B) | 107.4     |
| C (45) -C (44) -C (43)   | 113.3 (5) |
| C (45) -C (44) -H (44A)  | 108.9     |
| C (43) -C (44) -H (44A)  | 108.9     |
| C (45) -C (44) -H (44B)  | 108.9     |
| C (43) -C (44) -H (44B)  | 108.9     |
| H (44A) -C (44) -H (44B) | 107.7     |
| C (44) -C (45) -H (45A)  | 109.5     |
| C (44) -C (45) -H (45B)  | 109.5     |
| H (45A) -C (45) -H (45B) | 109.5     |
| C (44) -C (45) -H (45C)  | 109.5     |
| H (45A) -C (45) -H (45C) | 109.5     |
| H (45B) -C (45) -H (45C) | 109.5     |
| C (1) -N (1) -C (5)      | 118.6 (3) |
| C (1) -N (1) -Ru (1)     | 128.0 (3) |
| C (5) -N (1) -Ru (1)     | 113.4 (2) |
| C (10) -N (2) -C (6)     | 122.2 (3) |
| C (10) -N (2) -Ru (1)    | 119.1 (2) |
| C (6) -N (2) -Ru (1)     | 118.7 (2) |
| C (15) -N (3) -C (11)    | 118.3 (3) |
| C (15) -N (3) -Ru (1)    | 128.4 (3) |
| C (11) -N (3) -Ru (1)    | 113.3 (2) |
| C (16) -N (4) -C (20)    | 118.4 (4) |
| C (16) -N (4) -Ru (1)    | 125.1 (3) |
| C (20) -N (4) -Ru (1)    | 116.5 (3) |
| C (25) -N (5) -C (21)    | 118.8 (3) |
| C (25) -N (5) -Ru (1)    | 125.9 (3) |
| C (21) -N (5) -Ru (1)    | 115.3 (3) |
| O (1) -N (6) -O (2)      | 116.9 (4) |
| O (1) -N (6) -Ru (1)     | 122.6 (3) |
| O (2) -N (6) -Ru (1)     | 120.3 (3) |

|                        |             |
|------------------------|-------------|
| C (8) - O (3) - C (26) | 118.7 (3)   |
| F (5) - P (1) - F (4)  | 91.35 (15)  |
| F (5) - P (1) - F (3)  | 91.06 (16)  |
| F (4) - P (1) - F (3)  | 91.22 (15)  |
| F (5) - P (1) - F (1)  | 90.43 (15)  |
| F (4) - P (1) - F (1)  | 90.48 (14)  |
| F (3) - P (1) - F (1)  | 177.71 (16) |
| F (5) - P (1) - F (2)  | 90.25 (15)  |
| F (4) - P (1) - F (2)  | 178.20 (17) |
| F (3) - P (1) - F (2)  | 89.57 (14)  |
| F (1) - P (1) - F (2)  | 88.68 (13)  |
| F (5) - P (1) - F (6)  | 178.69 (16) |
| F (4) - P (1) - F (6)  | 89.83 (14)  |
| F (3) - P (1) - F (6)  | 89.48 (14)  |
| F (1) - P (1) - F (6)  | 89.00 (14)  |
| F (2) - P (1) - F (6)  | 88.56 (14)  |
| N (2) - Ru (1) - N (6) | 87.44 (13)  |
| N (2) - Ru (1) - N (1) | 79.71 (12)  |
| N (6) - Ru (1) - N (1) | 88.87 (13)  |
| N (2) - Ru (1) - N (4) | 95.47 (13)  |
| N (6) - Ru (1) - N (4) | 177.08 (13) |
| N (1) - Ru (1) - N (4) | 91.79 (12)  |
| N (2) - Ru (1) - N (3) | 79.52 (12)  |
| N (6) - Ru (1) - N (3) | 89.63 (12)  |
| N (1) - Ru (1) - N (3) | 159.22 (12) |
| N (4) - Ru (1) - N (3) | 90.75 (12)  |
| N (2) - Ru (1) - N (5) | 173.37 (14) |
| N (6) - Ru (1) - N (5) | 99.08 (14)  |
| N (1) - Ru (1) - N (5) | 99.13 (12)  |
| N (4) - Ru (1) - N (5) | 78.01 (14)  |
| N (3) - Ru (1) - N (5) | 101.57 (12) |

---

Symmetry transformations used to generate equivalent atoms:

Table 4. Anisotropic displacement parameters ( $\text{Å}^2 \times 10^3$ ) for vlad150322\_auto.

The anisotropic displacement factor exponent takes the form:

$$-2 \pi^2 [ h^2 a^{*2} U_{11} + \dots + 2 h k a^* b^* U_{12} ]$$

|        | U11    | U22     | U33   | U23    | U13   | U12   |
|--------|--------|---------|-------|--------|-------|-------|
| C(1)   | 38(2)  | 36(2)   | 33(2) | -2(2)  | -1(2) | 0(2)  |
| C(2)   | 41(2)  | 38(2)   | 37(2) | 0(2)   | -1(2) | 1(2)  |
| C(3)   | 33(2)  | 39(2)   | 45(2) | 0(2)   | -1(2) | 0(2)  |
| C(4)   | 39(2)  | 31(2)   | 39(2) | 1(2)   | 5(2)  | 0(2)  |
| C(5)   | 35(2)  | 28(2)   | 33(2) | 0(2)   | 4(1)  | 1(2)  |
| C(6)   | 35(2)  | 26(2)   | 32(2) | 0(1)   | 6(1)  | -1(1) |
| C(7)   | 32(2)  | 33(2)   | 36(2) | 2(2)   | 5(2)  | 1(2)  |
| C(8)   | 37(2)  | 30(2)   | 28(2) | 2(1)   | 10(1) | -1(2) |
| C(9)   | 37(2)  | 30(2)   | 30(2) | 0(2)   | 5(1)  | 0(2)  |
| C(10)  | 36(2)  | 30(2)   | 29(2) | 0(1)   | 4(1)  | 0(2)  |
| C(11)  | 33(2)  | 32(2)   | 26(2) | 0(1)   | 2(1)  | -1(2) |
| C(12)  | 38(2)  | 38(2)   | 31(2) | -1(2)  | 5(2)  | -2(2) |
| C(13)  | 36(2)  | 39(2)   | 36(2) | -1(2)  | 1(2)  | -1(2) |
| C(14)  | 33(2)  | 41(2)   | 38(2) | -1(2)  | 8(2)  | -1(2) |
| C(15)  | 32(2)  | 35(2)   | 35(2) | -1(2)  | 7(1)  | -2(2) |
| C(16)  | 48(2)  | 34(2)   | 41(2) | -4(2)  | -2(2) | 0(2)  |
| C(17)  | 58(3)  | 40(3)   | 56(3) | -6(2)  | -4(2) | 0(2)  |
| C(18)  | 62(3)  | 32(3)   | 69(3) | 4(2)   | -7(2) | -4(2) |
| C(19)  | 49(3)  | 45(3)   | 60(3) | 16(2)  | 2(2)  | -6(2) |
| C(20)  | 37(2)  | 39(2)   | 45(2) | 11(2)  | -2(2) | -1(2) |
| C(21)  | 36(2)  | 48(3)   | 38(2) | 19(2)  | 4(2)  | -2(2) |
| C(22)  | 47(2)  | 65(3)   | 45(2) | 18(2)  | 7(2)  | 2(2)  |
| C(23)  | 48(3)  | 84(4)   | 42(2) | 24(3)  | 7(2)  | 2(3)  |
| C(24)  | 44(2)  | 80(4)   | 28(2) | 4(2)   | 4(2)  | 4(2)  |
| C(25)  | 39(2)  | 60(3)   | 27(2) | 1(2)   | 5(2)  | 3(2)  |
| C(26)  | 35(2)  | 44(2)   | 29(2) | 3(2)   | 4(1)  | -1(2) |
| C(27)  | 39(2)  | 36(2)   | 30(2) | 1(2)   | 7(2)  | 1(2)  |
| C(28)  | 40(2)  | 43(2)   | 33(2) | 5(2)   | 5(2)  | 3(2)  |
| C(29)  | 34(2)  | 45(2)   | 33(2) | -1(2)  | 9(2)  | 6(2)  |
| C(30)  | 39(2)  | 33(2)   | 28(2) | 0(2)   | 6(1)  | -1(2) |
| C(31)  | 41(2)  | 37(2)   | 28(2) | -3(2)  | 5(2)  | -1(2) |
| C(32)  | 37(2)  | 42(2)   | 38(2) | -2(2)  | 4(2)  | -3(2) |
| C(33)  | 45(2)  | 44(2)   | 35(2) | -4(2)  | 12(2) | -8(2) |
| C(34)  | 56(3)  | 38(2)   | 34(2) | 2(2)   | 13(2) | -5(2) |
| C(35)  | 54(2)  | 38(3)   | 38(2) | 4(2)   | 8(2)  | 2(2)  |
| C(36)  | 43(2)  | 37(2)   | 30(2) | 1(2)   | 7(2)  | 1(2)  |
| C(37)  | 40(2)  | 37(2)   | 33(2) | 5(2)   | 5(2)  | 4(2)  |
| C(46)  | 39(8)  | 45(9)   | 39(9) | 3(7)   | -2(6) | 5(6)  |
| C(47)  | 39(7)  | 67(10)  | 43(7) | -13(8) | -3(6) | 4(8)  |
| C(48)  | 51(8)  | 109(13) | 48(7) | -24(7) | -5(5) | -7(9) |
| C(49)  | 83(9)  | 82(10)  | 46(6) | -16(6) | -2(5) | 13(7) |
| C(50)  | 85(8)  | 56(9)   | 49(6) | -3(6)  | 1(5)  | 15(6) |
| C(51)  | 71(7)  | 63(7)   | 67(6) | 9(5)   | 4(5)  | 5(5)  |
| C(46') | 40(10) | 52(11)  | 37(9) | 15(7)  | 7(8)  | 6(8)  |
| C(47') | 53(11) | 44(8)   | 40(7) | 9(7)   | -1(7) | 2(7)  |
| C(48') | 42(8)  | 48(7)   | 43(7) | 15(5)  | 5(5)  | 4(6)  |
| C(49') | 93(10) | 56(9)   | 39(6) | 6(6)   | 16(6) | 7(7)  |
| C(50') | 79(7)  | 43(7)   | 61(7) | 7(5)   | 16(5) | 9(6)  |
| C(51') | 72(8)  | 40(7)   | 64(9) | 6(6)   | 0(6)  | 1(6)  |
| C(38)  | 39(2)  | 36(2)   | 29(2) | -2(2)  | 7(2)  | 1(2)  |
| C(39)  | 33(2)  | 39(2)   | 29(2) | 0(2)   | 5(1)  | 2(2)  |

|        |        |        |        |         |        |         |
|--------|--------|--------|--------|---------|--------|---------|
| C (40) | 52 (2) | 39 (2) | 44 (2) | 7 (2)   | 12 (2) | 10 (2)  |
| C (41) | 57 (3) | 44 (3) | 55 (3) | -6 (2)  | 15 (2) | 0 (2)   |
| C (42) | 59 (3) | 48 (3) | 65 (3) | -9 (2)  | 20 (2) | 1 (2)   |
| C (43) | 65 (3) | 62 (4) | 93 (4) | -30 (3) | 25 (3) | -16 (3) |
| C (44) | 66 (3) | 56 (3) | 77 (4) | -15 (3) | 18 (3) | -5 (3)  |
| C (45) | 64 (3) | 54 (3) | 68 (3) | -8 (3)  | -5 (3) | 4 (3)   |
| N (1)  | 32 (2) | 32 (2) | 32 (2) | 0 (1)   | 4 (1)  | 0 (1)   |
| N (2)  | 30 (2) | 30 (2) | 32 (2) | -1 (1)  | 5 (1)  | -2 (1)  |
| N (3)  | 29 (1) | 31 (2) | 30 (2) | 2 (1)   | 1 (1)  | 2 (1)   |
| N (4)  | 33 (2) | 35 (2) | 36 (2) | 6 (1)   | -1 (1) | -3 (1)  |
| N (5)  | 32 (2) | 50 (2) | 26 (2) | 10 (1)  | 6 (1)  | -3 (1)  |
| N (6)  | 35 (2) | 44 (2) | 38 (2) | -6 (2)  | 1 (1)  | 6 (2)   |
| O (1)  | 57 (2) | 48 (2) | 40 (2) | -9 (1)  | 3 (1)  | -2 (2)  |
| O (2)  | 44 (2) | 37 (2) | 42 (2) | 5 (1)   | 4 (1)  | 0 (1)   |
| O (3)  | 36 (1) | 47 (2) | 30 (1) | 7 (1)   | 8 (1)  | 3 (1)   |
| F (1)  | 35 (1) | 53 (2) | 52 (1) | -9 (1)  | 4 (1)  | -2 (1)  |
| F (2)  | 44 (1) | 59 (2) | 40 (1) | -6 (1)  | 1 (1)  | -7 (1)  |
| F (3)  | 44 (1) | 57 (2) | 51 (1) | 6 (1)   | 7 (1)  | -4 (1)  |
| F (4)  | 55 (2) | 60 (2) | 41 (1) | 1 (1)   | -6 (1) | 5 (1)   |
| F (5)  | 47 (1) | 46 (2) | 77 (2) | -8 (1)  | -4 (1) | 5 (1)   |
| F (6)  | 41 (1) | 47 (2) | 42 (1) | -2 (1)  | 2 (1)  | 4 (1)   |
| P (1)  | 37 (1) | 43 (1) | 40 (1) | -2 (1)  | 1 (1)  | 0 (1)   |
| Ru (1) | 31 (1) | 33 (1) | 27 (1) | 1 (1)   | 4 (1)  | 0 (1)   |

---

### 3. Atomic coordinates (B3PW91/6-31G\*)

*A*

|   |            |           |           |
|---|------------|-----------|-----------|
| O | -2.618534  | -0.509918 | 0.222921  |
| C | -3.299266  | -1.283733 | -0.754479 |
| H | -2.857897  | -1.142445 | -1.753232 |
| H | -3.215619  | -2.357415 | -0.519260 |
| C | -4.756166  | -0.894892 | -0.787998 |
| C | -8.875970  | 0.096253  | -0.610501 |
| C | -9.023426  | 0.338556  | 0.768648  |
| C | -11.351755 | 0.827988  | 0.419594  |
| C | -9.964353  | 0.219907  | -1.475674 |
| H | -9.855073  | 0.033699  | -2.541456 |
| C | -11.203457 | 0.587755  | -0.949654 |
| H | -12.060835 | 0.688096  | -1.610472 |
| C | -10.260567 | 0.703778  | 1.286062  |
| H | -10.387808 | 0.892936  | 2.349886  |
| C | -5.429445  | -0.561843 | 0.396135  |
| H | -4.876487  | -0.544185 | 1.331661  |
| C | -6.819219  | -0.600256 | -2.051057 |
| H | -7.344319  | -0.612546 | -3.003139 |
| C | -6.781060  | -0.249386 | 0.353093  |
| C | -5.459212  | -0.904479 | -1.999833 |
| H | -4.932339  | -1.152201 | -2.919178 |
| C | -7.480507  | -0.270260 | -0.868114 |
| C | -7.702402  | 0.142455  | 1.501628  |
| C | -7.235451  | 1.447056  | 2.173667  |
| H | -7.940611  | 1.750768  | 2.955800  |
| H | -6.253268  | 1.309579  | 2.640091  |
| H | -7.158695  | 2.261160  | 1.445232  |
| C | -7.803440  | -0.980552 | 2.550125  |
| H | -8.517642  | -0.709907 | 3.336224  |
| H | -8.134718  | -1.919187 | 2.093429  |
| H | -6.830482  | -1.153439 | 3.024016  |
| H | -12.323462 | 1.113569  | 0.814637  |
| H | -1.753953  | -0.921390 | 0.363608  |

*C*

|    |           |           |           |
|----|-----------|-----------|-----------|
| Ru | 0.448318  | 0.014662  | -0.607328 |
| N  | -1.503769 | 0.158118  | -0.251240 |
| C  | -2.226322 | -0.977066 | -0.174922 |
| C  | -1.414322 | -2.207005 | -0.283889 |
| N  | 0.246464  | 2.100091  | -0.418519 |
| N  | -0.072103 | -2.019672 | -0.465457 |
| C  | 0.275177  | -4.379020 | -0.474299 |
| H  | 0.973449  | -5.204035 | -0.555277 |
| C  | -2.042135 | 1.394756  | -0.134389 |
| C  | -3.402017 | 1.524887  | 0.058266  |
| H  | -3.883914 | 2.489315  | 0.160062  |
| C  | 0.950940  | 4.377991  | -0.370827 |
| H  | 1.765577  | 5.089235  | -0.443217 |
| C  | -1.048888 | 2.485369  | -0.210628 |



|   |           |           |           |
|---|-----------|-----------|-----------|
| C | -4.197752 | 0.360078  | 0.125929  |
| C | -1.939147 | -3.490068 | -0.195047 |
| H | -3.002529 | -3.638438 | -0.050879 |
| C | -3.597658 | -0.909605 | 0.015547  |
| H | -4.188867 | -1.812548 | 0.080063  |
| C | 0.747175  | -3.073175 | -0.558459 |
| H | 1.799069  | -2.861016 | -0.705983 |
| C | 1.216063  | 3.019289  | -0.501720 |
| H | 2.219663  | 2.652934  | -0.679599 |
| C | -1.369084 | 3.830079  | -0.071470 |
| H | -2.395284 | 4.132677  | 0.098480  |
| C | -0.358968 | 4.786706  | -0.151320 |
| H | -0.600283 | 5.838896  | -0.043498 |
| C | -1.086031 | -4.588086 | -0.291911 |
| H | -1.488457 | -5.593240 | -0.225082 |
| N | 0.274269  | 0.038115  | -2.366722 |
| O | 0.201438  | 0.037340  | -3.497616 |
| C | 2.194547  | -0.178749 | 1.765006  |
| C | 2.596088  | -0.253348 | 3.096420  |
| H | 3.643776  | -0.357907 | 3.347639  |
| C | 1.645121  | -0.192112 | 4.108543  |
| H | 1.952261  | -0.249643 | 5.147429  |
| C | 0.304000  | -0.056757 | 3.767825  |
| H | -0.475057 | -0.003246 | 4.519262  |
| C | -0.039791 | 0.008471  | 2.426163  |
| H | -1.074576 | 0.110952  | 2.130854  |
| N | 0.877447  | -0.051811 | 1.444934  |
| C | 3.341140  | -0.178658 | -1.691284 |
| H | 2.852608  | -0.110068 | -2.654310 |
| C | 4.721925  | -0.288862 | -1.612064 |
| H | 5.306848  | -0.307816 | -2.524336 |
| C | 5.316036  | -0.370613 | -0.357540 |
| H | 6.392583  | -0.457216 | -0.256310 |
| C | 4.509728  | -0.338493 | 0.774426  |
| H | 4.958471  | -0.399138 | 1.757539  |
| C | 3.127910  | -0.226168 | 0.633694  |
| N | 2.559001  | -0.148443 | -0.597306 |
| O | -5.491315 | 0.563183  | 0.303596  |
| C | -6.384866 | -0.556576 | 0.391824  |
| H | -7.373878 | -0.121138 | 0.522760  |
| H | -6.355842 | -1.143778 | -0.530438 |
| H | -6.134996 | -1.178501 | 1.256347  |

**AC (fluorene  $\perp$  terpyridine)**

|   |           |           |           |
|---|-----------|-----------|-----------|
| O | 2.536916  | 0.131224  | -0.730470 |
| C | 3.317492  | 1.358806  | -0.629743 |
| H | 3.031847  | 2.011879  | -1.460723 |
| H | 3.068057  | 1.842742  | 0.320039  |
| C | 4.767028  | 0.988646  | -0.691435 |
| C | 8.847467  | -0.129382 | -0.605022 |
| C | 9.031832  | -0.335112 | 0.775316  |
| C | 11.330147 | -0.907914 | 0.365479  |
| C | 9.901016  | -0.312187 | -1.502730 |

|    |           |           |           |
|----|-----------|-----------|-----------|
| H  | 9.761105  | -0.154810 | -2.569407 |
| C  | 11.144598 | -0.703333 | -1.005817 |
| H  | 11.976410 | -0.850395 | -1.689830 |
| C  | 10.273871 | -0.724952 | 1.263748  |
| H  | 10.431568 | -0.887431 | 2.327639  |
| C  | 5.458518  | 0.663675  | 0.485247  |
| H  | 4.939379  | 0.700331  | 1.441051  |
| C  | 6.775101  | 0.593125  | -2.004732 |
| H  | 7.277992  | 0.573637  | -2.967969 |
| C  | 6.797001  | 0.305758  | 0.414421  |
| C  | 5.430602  | 0.950754  | -1.925091 |
| H  | 4.887918  | 1.209101  | -2.831488 |
| C  | 7.456027  | 0.269923  | -0.829876 |
| C  | 7.743322  | -0.075285 | 1.544874  |
| C  | 7.262492  | -1.341860 | 2.277638  |
| H  | 7.988821  | -1.641432 | 3.041581  |
| H  | 6.304795  | -1.158131 | 2.777967  |
| H  | 7.132624  | -2.176966 | 1.581134  |
| C  | 7.911487  | 1.081355  | 2.548126  |
| H  | 8.644494  | 0.816691  | 3.318457  |
| H  | 8.253474  | 1.993159  | 2.047200  |
| H  | 6.960863  | 1.298773  | 3.048487  |
| H  | 12.305354 | -1.212238 | 0.736931  |
| Ru | -3.495835 | -0.004541 | -0.583901 |
| N  | -1.508494 | 0.074130  | -0.585718 |
| C  | -0.912895 | 1.279113  | -0.484382 |
| C  | -1.863052 | 2.396523  | -0.305684 |
| N  | -3.032929 | -2.052654 | -0.687227 |
| N  | -3.186761 | 2.053318  | -0.280395 |
| C  | -3.791955 | 4.335927  | 0.050907  |
| H  | -4.581265 | 5.066041  | 0.187315  |
| C  | -0.824259 | -1.086344 | -0.718390 |
| C  | 0.553779  | -1.058064 | -0.766811 |
| H  | 1.147723  | -1.958056 | -0.865674 |
| C  | -3.460373 | -4.395533 | -0.802126 |
| H  | -4.190634 | -5.196399 | -0.814696 |
| C  | -1.687697 | -2.283634 | -0.764802 |
| C  | 1.218044  | 0.185765  | -0.676166 |
| C  | -1.478324 | 3.722261  | -0.152865 |
| H  | -0.429947 | 3.994655  | -0.171478 |
| C  | 0.469679  | 1.371110  | -0.526430 |
| H  | 0.958842  | 2.331391  | -0.440578 |
| C  | -4.121923 | 2.993932  | -0.108676 |
| H  | -5.152884 | 2.661030  | -0.103962 |
| C  | -3.893369 | -3.077529 | -0.706531 |
| H  | -4.946274 | -2.829903 | -0.651913 |
| C  | -1.200984 | -3.580853 | -0.865112 |
| H  | -0.134254 | -3.760126 | -0.926985 |
| C  | -2.096254 | -4.648558 | -0.883822 |
| H  | -1.725166 | -5.664963 | -0.961834 |
| C  | -2.452466 | 4.702944  | 0.026754  |
| H  | -2.159831 | 5.740793  | 0.145725  |
| N  | -3.656187 | 0.175844  | -2.335073 |
| O  | -3.809774 | 0.297471  | -3.451485 |
| C  | -4.794854 | -0.302054 | 2.049171  |

|   |           |           |           |
|---|-----------|-----------|-----------|
| C | -4.954231 | -0.437117 | 3.425992  |
| H | -5.944257 | -0.502410 | 3.858250  |
| C | -3.835197 | -0.489806 | 4.249054  |
| H | -3.953785 | -0.594893 | 5.322218  |
| C | -2.571217 | -0.408216 | 3.675667  |
| H | -1.667836 | -0.447170 | 4.272957  |
| C | -2.471061 | -0.272724 | 2.299366  |
| H | -1.501481 | -0.207874 | 1.826297  |
| N | -3.551584 | -0.217955 | 1.501274  |
| C | -6.540120 | -0.080786 | -1.138977 |
| H | -6.228590 | 0.012739  | -2.171025 |
| C | -7.887728 | -0.152945 | -0.816900 |
| H | -8.626468 | -0.112801 | -1.609023 |
| C | -8.250967 | -0.275515 | 0.519689  |
| H | -9.294815 | -0.333466 | 0.809254  |
| C | -7.255166 | -0.326208 | 1.488341  |
| H | -7.524056 | -0.425068 | 2.532313  |
| C | -5.917397 | -0.248837 | 1.105577  |
| N | -5.575219 | -0.123741 | -0.202924 |

**AC (fluorene // terpyridine)**

|   |           |           |           |
|---|-----------|-----------|-----------|
| O | 2.580965  | 0.387170  | -0.346319 |
| C | 3.287136  | 1.637725  | -0.309247 |
| H | 3.063944  | 2.192024  | -1.229498 |
| H | 2.926410  | 2.223135  | 0.545630  |
| C | 4.766122  | 1.375958  | -0.180914 |
| C | 8.907215  | 0.568921  | 0.184513  |
| C | 8.896142  | -0.838876 | 0.170345  |
| C | 11.290308 | -0.845243 | 0.388583  |
| C | 10.107525 | 1.272193  | 0.300347  |
| H | 10.120320 | 2.359408  | 0.311318  |
| C | 11.299370 | 0.553171  | 0.402019  |
| H | 12.243103 | 1.084936  | 0.492776  |
| C | 10.086799 | -1.548925 | 0.272849  |
| H | 10.091929 | -2.636667 | 0.263897  |
| C | 5.302486  | 0.084067  | -0.151804 |
| H | 4.644894  | -0.777044 | -0.220796 |
| C | 6.993044  | 2.331421  | 0.028717  |
| H | 7.634902  | 3.205930  | 0.097047  |
| C | 6.677891  | -0.076924 | -0.027297 |
| C | 5.615077  | 2.488849  | -0.092120 |
| H | 5.192132  | 3.491006  | -0.117156 |
| C | 7.525162  | 1.040797  | 0.062571  |
| C | 7.475832  | -1.372766 | 0.035991  |
| C | 7.305125  | -2.200892 | -1.251076 |
| H | 7.934181  | -3.097729 | -1.217758 |
| H | 6.264129  | -2.524434 | -1.365542 |
| H | 7.583716  | -1.618531 | -2.135735 |
| C | 7.076442  | -2.215849 | 1.261527  |
| H | 7.705429  | -3.110477 | 1.332973  |
| H | 7.187531  | -1.642916 | 2.188252  |
| H | 6.033216  | -2.542410 | 1.181446  |
| H | 12.227194 | -1.390604 | 0.469142  |

|    |           |           |           |
|----|-----------|-----------|-----------|
| Ru | -3.435641 | -0.045393 | -0.591611 |
| N  | -1.456921 | 0.132416  | -0.472747 |
| C  | -0.926596 | 1.370178  | -0.421927 |
| C  | -1.936397 | 2.447999  | -0.374711 |
| N  | -2.871400 | -2.070850 | -0.522837 |
| N  | -3.241852 | 2.041951  | -0.406597 |
| C  | -3.969792 | 4.307475  | -0.241548 |
| H  | -4.798445 | 5.004312  | -0.191772 |
| C  | -0.712799 | -0.998168 | -0.473307 |
| C  | 0.663114  | -0.903363 | -0.429748 |
| H  | 1.303310  | -1.776455 | -0.421119 |
| C  | -3.179518 | -4.435875 | -0.505110 |
| H  | -3.868818 | -5.272273 | -0.511635 |
| C  | -1.514715 | -2.237848 | -0.493369 |
| C  | 1.258969  | 0.375589  | -0.390205 |
| C  | -1.622590 | 3.797850  | -0.279304 |
| H  | -0.588883 | 4.120805  | -0.253776 |
| C  | 0.450567  | 1.528852  | -0.384561 |
| H  | 0.887723  | 2.516598  | -0.346696 |
| C  | -4.227802 | 2.944272  | -0.342366 |
| H  | -5.240421 | 2.561783  | -0.379275 |
| C  | -3.678907 | -3.138195 | -0.530204 |
| H  | -4.743863 | -2.943188 | -0.558806 |
| C  | -0.962206 | -3.512182 | -0.469085 |
| H  | 0.113227  | -3.640939 | -0.444118 |
| C  | -1.803005 | -4.623458 | -0.475177 |
| H  | -1.380025 | -5.622215 | -0.456661 |
| C  | -2.649506 | 4.737904  | -0.212131 |
| H  | -2.412327 | 5.793846  | -0.137534 |
| N  | -3.483247 | -0.003096 | -2.358539 |
| O  | -3.564737 | 0.020319  | -3.488662 |
| C  | -4.893013 | -0.222132 | 1.968251  |
| C  | -5.136696 | -0.252873 | 3.339050  |
| H  | -6.148817 | -0.333331 | 3.713785  |
| C  | -4.072972 | -0.177280 | 4.230996  |
| H  | -4.257598 | -0.201222 | 5.299724  |
| C  | -2.779100 | -0.070996 | 3.733048  |
| H  | -1.916754 | -0.010559 | 4.386568  |
| C  | -2.594998 | -0.039848 | 2.359222  |
| H  | -1.602458 | 0.044537  | 1.939461  |
| N  | -3.621751 | -0.112299 | 1.494678  |
| C  | -6.428611 | -0.309283 | -1.332817 |
| H  | -6.051235 | -0.260134 | -2.345850 |
| C  | -7.788708 | -0.441803 | -1.093743 |
| H  | -8.473665 | -0.492252 | -1.932214 |
| C  | -8.233274 | -0.507524 | 0.222224  |
| H  | -9.289192 | -0.611907 | 0.447857  |
| C  | -7.304314 | -0.437604 | 1.254042  |
| H  | -7.637762 | -0.489338 | 2.282681  |
| C  | -5.950046 | -0.303443 | 0.953569  |
| N  | -5.527859 | -0.242059 | -0.335735 |

#### 4. Photorelease experiments at $\lambda = 300$ nm

*AC*

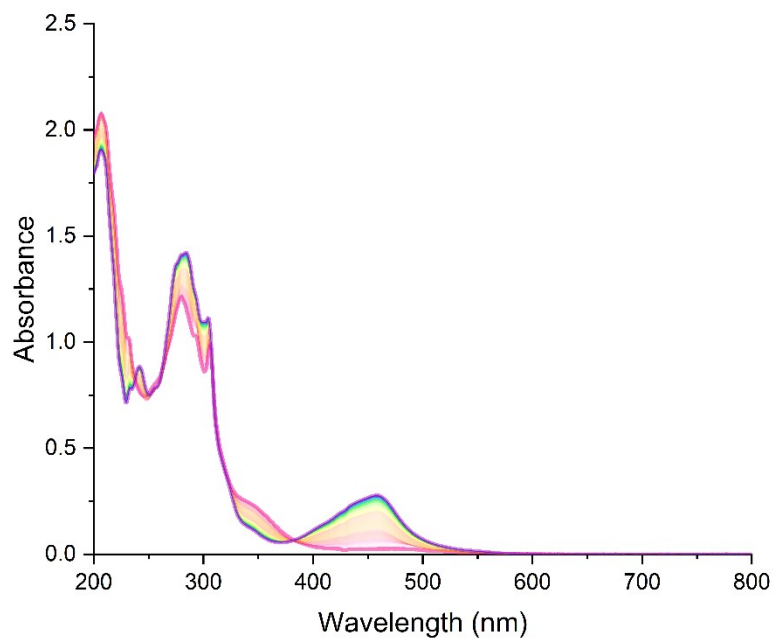

*C*

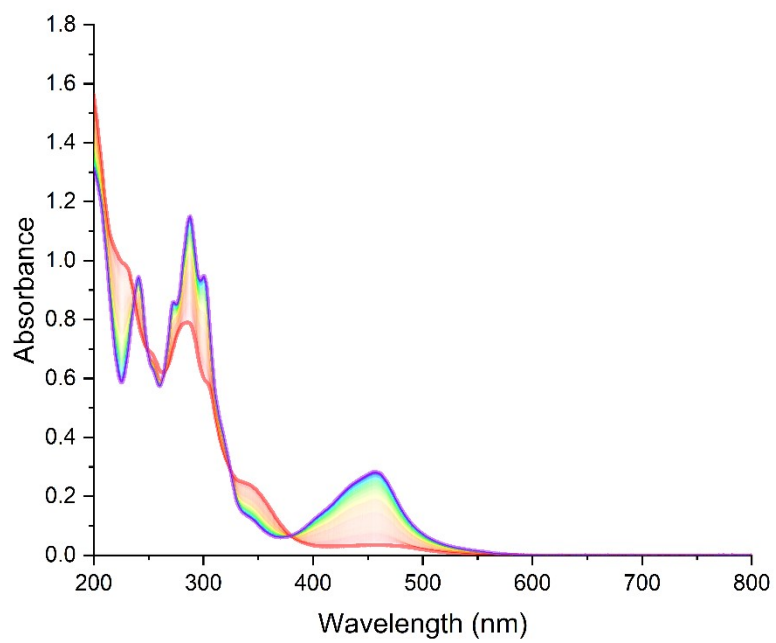

## 5. Rotation barrier

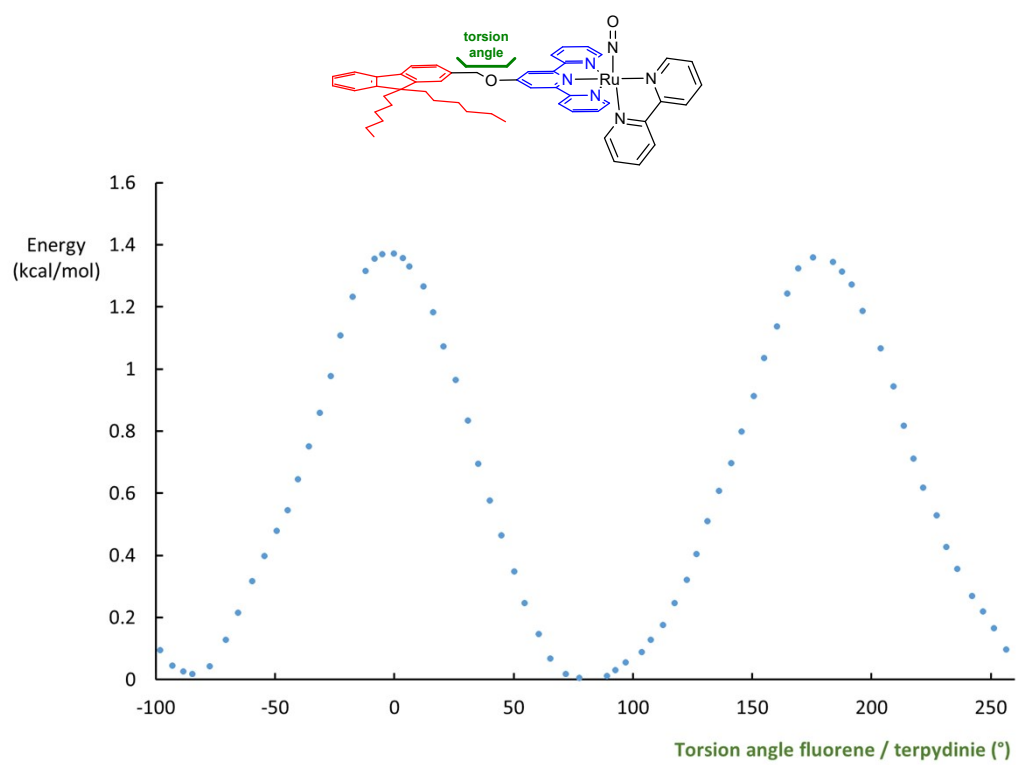

Supplement: d4dt01154f1.pdf [file d4dt01154f1.pdf]
